# Supplementary material for: Direct observation of magnetic monopole defects in an artificial spin-ice system
Source: Springer Nature journal article supplement (doi:10.1038/nphys1628), 2010-04-11
Supplement: nphys1628-s1.pdf [file nphys1628-s1.pdf]

Browse Articles
| Nature Physics


Skip to main content

Thank you for visiting nature.com. You are using a browser version with limited support for CSS. To obtain
the best experience, we recommend you use a more up to date browser (or turn off compatibility mode in
Internet Explorer). In the meantime, to ensure continued support, we are displaying the site without styles
and JavaScript.

Advertisement


- View all journals
- Search
- Log in

- Explore content
- About the journal
- Publish with us

- Sign up for alerts
- RSS feed


1. nature
2. nature physics
3. browse articles

# Browse Articles

## Filter By:

Article Type

All

- All
- Article (1531)
- Author Correction (69)
- Books & Arts (202)
- Comment (61)
- Commentary (100)
- Correspondence (47)
- Editorial (280)
- Futures (48)
- In This Issue (27)
- Letter (1463)
- Measure for Measure (105)
- News & Views (1427)
- Perspective (53)
- Progress Article (26)
- Publisher Correction (57)
- Research Briefing (48)
- Research Highlight (165)
- Research Highlights (501)
- Review Article (85)
- Thesis (255)

Year

All

- All
- 2024 (346)
- 2023 (432)
- 2022 (389)
- 2021 (361)
- 2020 (354)
- 2019 (358)
- 2018 (388)
- 2017 (343)
- 2016 (379)
- 2015 (391)
- 2014 (345)
- 2013 (322)
- 2012 (322)
- 2011 (306)
- 2010 (327)
- 2009 (299)
- 2008 (315)
- 2007 (321)
- 2006 (288)
- 2005 (108)

- ### Non-Abelian chiral dynamics in a lattice under synthetic SU(2) gauge fields

  A tunable SU(2) gauge field has been realized experimentally in a Raman momentum lattice using ultracold atoms. The chiral dynamics of the system have been investigated under different gauge potentials, whose non-Abelian nature was confirmed through observation of the non-Abelian Aharonov–Bohm effect.

  Research Briefing20 Sept 2024
- ### A dual-species Rydberg array

  Rydberg atoms in optical tweezers are a promising platform for quantum information science. A platform composed of dual-species Rydberg arrays has been realized, offering access to unexplored interaction regimes and crosstalk-free midcircuit control.

  - Shraddha Anand
  - Conor E. Bradley
  - Hannes Bernien

  ArticleOpen Access20 Sept 2024
- ### Chiral dynamics of ultracold atoms under a tunable SU(2) synthetic gauge field

  The implementation of synthetic Abelian gauge fields in quantum simulators can result in chiral edge currents. The impact of non-Abelian gauge fields on chiral dynamics of ultracold atoms is now explored using a momentum-space lattice technique.

  - Qian Liang
  - Zhaoli Dong
  - Bo Yan

  Article20 Sept 2024
- ### Ultracold atoms pushed to the edge

  Topological insulators exhibit unidirectional flow of robust electric charge at the edge of the system. Two recent experiments have observed these chiral edge modes in exceptionally controllable settings of ultracold atoms.

  - Luca Asteria
  - F. Nur Ünal

  News & Views19 Sept 2024
- ### A general theory of quantum codes connecting quantum computation, complexity and physics

  Approximate notions of quantum error-correcting codes hold wide importance across quantum information and physics, but are not cohesively understood. Now, general rigorous connections established between approximate quantum error correction and quantum circuit complexity reveal a ‘complexity phase diagram’ for generalized quantum codes — and create a new unifying lens on complex quantum systems.

  Research Briefing18 Sept 2024
- ### Intertwined vestigial orders in stacked magnetic flatlands

  Dimensionality tuning can control fluctuations and induce complex phase diagrams with multiple orders and transitions among them. Now, experiments demonstrate intertwined vestigial order in the two- to three-dimensional crossover region in a van der Waals magnet.

  - Ana-Marija Nedić
  - Peter P. Orth

  News & Views18 Sept 2024
- ### Propagation of insulator-to-metal transition driven by photoinduced strain waves in a Mott material

  The mechanism behind the ultrafast insulator-to-metal transition in Mott materials is still not well understood. Now, it is shown that this phase transition propagates along the pathway of a photoinduced compressive strain wave in prototypical V2O3.

  - Tatsuya Amano
  - Danylo Babich
  - Etienne Janod

  Article17 Sept 2024
- ### Probing inhomogeneous cuprate superconductivity by terahertz Josephson echo spectroscopy

  By measuring terahertz photon echoes, multidimensional spectroscopy demonstrates that interlayer tunnelling in a cuprate superconductor remains largely unaffected by electronic disorder, even near the phase transition.

  - A. Liu
  - D. Pavićević
  - A. Cavalleri

  ArticleOpen Access16 Sept 2024
- ### The many faces of foams

  - Bart Verberck

  News & Views12 Sept 2024
- ### Wiggles in the shade

  - Leonardo Benini

  News & Views12 Sept 2024
- ### Photon gas crosses dimensions

  The collective behaviour of quantum gases strongly depends on the confining dimensionality. Its role in the emergence of a phase transition in a quantum gas of photons has now been explored using a new trapping technique, transitioning from 2D to 1D.

  - Arturo Camacho-Guardian

  News & Views12 Sept 2024
- ### An unbreakable limit

  The Fisher information imposes a fundamental limit on the precision with which an unknown parameter can be estimated from noisy data, as Dorian Bouchet explains.

  - Dorian Bouchet

  Measure for Measure12 Sept 2024
- ### The laws of inflating the AI bubble

  - Mark Buchanan

  Thesis12 Sept 2024
- ### Tap the potential of PhD students

  PhD students can face many challenges, such as a lack of confidence in their newly acquired skills or the uncertainty about which career path to choose. We highlight some ways to empower students in their doctoral journey.

  Editorial12 Sept 2024
- ### Energy partitioning in the cell cortex

  How cells manage the internal energetic budget to drive mechanical and chemical dynamics is still an open question. Now it is shown that the allocation of energy depends on the distance from thermodynamic equilibrium.

  - Sheng Chen
  - Daniel S. Seara
  - Michael P. Murrell

  Article12 Sept 2024
- ### Emergence of ferromagnetism at the onset of moiré Kondo breakdown

  Kondo physics has been observed in moiré bilayers, but the expected magnetic transitions have not been reported. Now, a metal–insulator transition with ferromagnetic order that develops at nearly the same time is reported in a moiré bilayer.

  - Wenjin Zhao
  - Bowen Shen
  - Kin Fai Mak

  Article09 Sept 2024
- ### Observation of chiral edge transport in a rapidly rotating quantum gas

  Edge modes are a key feature of topological materials, but their propagation is difficult to directly observe in condensed matter systems. The controlled injection and propagation of chiral edge modes has now been shown in a rotating ultracold gas.

  - Ruixiao Yao
  - Sungjae Chi
  - Richard J. Fletcher

  Article06 Sept 2024
- ### Dimensional crossover in a quantum gas of light

  The dimensionality of a many-body system strongly impacts its physical behaviour. Now, a crossover from 1D to 2D has been observed in the Bose–Einstein condensate of a photon gas.

  - Kirankumar Karkihalli Umesh
  - Julian Schulz
  - Frank Vewinger

  Article06 Sept 2024
- ### Complexity and order in approximate quantum error-correcting codes

  Approximate—rather than exact—quantum error correction is a useful but relatively unexplored idea in quantum computing and many-body physics. A theoretical framework has now been established based on connections with quantum circuit complexity.

  - Jinmin Yi
  - Weicheng Ye
  - Zi-Wen Liu

  Article03 Sept 2024
- ### Opportunities in nanoscale probing of laser-driven phase transitions

  Optical near-field microscopy has facilitated our understanding of nanophotonics. This Perspective explores the opportunities that near-field studies of terahertz fields provide for ultrafast phase transitions in condensed matter systems.

  - Michael Yannai
  - Matan Haller
  - Ido Kaminer

  Perspective28 Aug 2024

- Previous page
- page 1
- page 2
- page 3
- …
- page 335
- Next page

## Explore content

- Research articles
- Reviews & Analysis
- News & Comment
- Current issue
- Collections
- Subjects

- Follow us on Facebook
- Follow us on Twitter
- Sign up for alerts
- RSS feed


## About the journal

- Aims & Scope
- Journal Information
- Journal Metrics
- Our publishing models
- About the Editors
- Reviews Cross-Journal Editorial Team
- Research Cross-Journal Editorial Team
- Editorial Values Statement
- Editorial Policies
- Content Types
- Web Feeds
- Contact


## Publish with us

- Submission Guidelines
- For Reviewers
- Language editing services
- Submit manuscript

## Search

Search articles by subject, keyword or author

Show results from

All journals
This journal

Search

Advanced search

### Quick links

- Explore articles by subject
- Find a job
- Guide to authors
- Editorial policies

Nature Physics (*Nat. Phys.*)

ISSN 1745-2481 (online)

ISSN 1745-2473 (print)

## nature.com sitemap

### About Nature Portfolio

- About us
- Press releases
- Press office
- Contact us

### Discover content

- Journals A-Z
- Articles by subject
- protocols.io
- Nature Index

### Publishing policies

- Nature portfolio policies
- Open access

### Author & Researcher services

- Reprints & permissions
- Research data
- Language editing
- Scientific editing
- Nature Masterclasses
- Research Solutions

### Libraries & institutions

- Librarian service & tools
- Librarian portal
- Open research
- Recommend to library

### Advertising & partnerships

- Advertising
- Partnerships & Services
- Media kits
- Branded
  content

### Professional development

- Nature Careers
- Nature 
  Conferences

### Regional websites

- Nature Africa
- Nature China
- Nature India
- Nature Italy
- Nature Japan
- Nature Middle East

- Privacy
  Policy
- Use
  of cookies
- Your privacy choices/Manage cookies
- Legal
  notice
- Accessibility
  statement
- Terms & Conditions
- Your US state privacy rights

© 2024 Springer Nature Limited

xml version="1.0" encoding="UTF-8"?
